# Supplementary material
Source: PubMed Central journal article supplement (PMC4743751)
Supplement: NIHMS749808-supplement-supplement_1.pdf [file NIHMS749808-supplement-supplement_1.pdf]

**Table S1. Representative Examples of Functional Effects of mtDNA Haplogroups**

| CONTINENT | POPULATION        | ENDURANCE            | SPRINT/POWER | REFERENCE                    |
|-----------|-------------------|----------------------|--------------|------------------------------|
| Africa    | Kenyans           | ↑L0                  |              | (Scott et al., 2009)         |
|           | African-Americans |                      | ↑non-L       | (Deason et al., 2012)        |
| Europe    | Finnish           | ↑I                   | ↑Uk, ↑J      | (Niemi and Majamaa, 2005)    |
|           | Polish            | ↑H, ↑16080C, ↓16362C |              | (Maruszak et al., 2014)      |
|           | Spanish           | ↑V                   |              | (Nogales-Gadea et al., 2011) |
| Asia      | Japanese          | ↑G1                  | ↑F           | (Mikami et al., 2011)        |
|           | Korean            | ↑M*, ↑N9, ↓B         |              | (Kim et al., 2012)           |

**Table S2. Representative Examples of Haplogroup Associations which Predisposition to Clinical Phenotypes**

| Clinical Phenotype                  | Haplogroup                       | Effect    | References                                                                                |
|-------------------------------------|----------------------------------|-----------|-------------------------------------------------------------------------------------------|
| LHON                                | J                                | ↑ risk    | (Brown et al., 1997; Brown et al., 1995; Johns et al., 1992; Torroni et al., 1997)        |
| AMD, drusen levels, retinal pigment | J + U                            | ↑ risk    | (Udar et al., 2009), (Jones et al., 2007)                                                 |
| AMD                                 | H                                | ↓ risk    | (Jones et al., 2007)                                                                      |
| Longevity, Europeans                | J                                | Increased | (De Benedictis et al., 1999; Ivanova et al., 1998; Niemi et al., 2003; Rose et al., 2001) |
| Longevity, Europeans                | J2 & U3, CR 150C>T               | Increased | (Chen et al., 2012).                                                                      |
| Longevity, Asians                   | D                                | Increased | (Tanaka et al., 1998)                                                                     |
| AD & PD                             | J + Uk                           | ↓ risk    | (Ghezzi et al., 2005; van der Walt et al., 2004; van der Walt et al., 2003)               |
| PD                                  | H                                | ↑ risk    | (Khusnutdinova et al., 2008)                                                              |
| AD & PD                             | H5a, tRNA <sup>Gln</sup> 4336A>G | ↑ risk    | (Shoffner et al., 1993)                                                                   |

|                               |                   |           |                             |
|-------------------------------|-------------------|-----------|-----------------------------|
| Diabetes, Europeans           | J                 | ↑ risk    | (Crispim et al., 2006)      |
| Diabetes, Asians              | N9a               | ↓ risk    | (Fuku et al., 2007)         |
| Myocardial Infarction, Asians | N9a               | ↑ risk    | (Nishigaki et al., 2007)    |
| Sepsis                        | H                 | ↓ risk    | (Baudouin et al., 2005)     |
| Serum IgE levels              | U                 | increased | (Raby et al., 2007)         |
| AIDS Progression              | Uk                | impedes   | (Hendrickson et al., 2008)  |
| Osteoarthritis                | J + T             | ↓ risk    | (Soto-Hermida et al., 2014) |
| Prostate & Renal Cancer       | U                 | ↑ risk    | (Booker et al., 2006)       |
| Breast Cancer                 | N, 10398G>A (A>T) | ↑ risk    | (Darvishi et al., 2007)     |
| Breast Cancer                 | M, D5             | ↑ risk    | (Fang et al., 2010)         |
| Thyroid Cancer                | D4a               | ↑ risk    | (Fang et al., 2010)         |

## REFERENCES

- Baudouin, S.V., Saunders, D., Tiangyou, W., Elson, J.L., Poynter, J., Pyle, A., Keers, S., Turnbull, D.M., Howell, N., and Chinnery, P.F. (2005). Mitochondrial DNA and survival after sepsis: a prospective study. *Lancet* 366, 2118-2121.
- Booker, L.M., Habermacher, G.M., Jessie, B.C., Sun, Q.C., Baumann, A.K., Amin, M., Lim, S.D., Fernandez-Golarz, C., Lyles, R.H., Brown, M.D., *et al.* (2006). North American white mitochondrial haplogroups in prostate and renal cancer. *J Urol* 175, 468-472; discussion 472-473.
- Brown, M.D., Sun, F., and Wallace, D.C. (1997). Clustering of Caucasian Leber hereditary optic neuropathy patients containing the 11778 or 14484 mutations on an mtDNA lineage. *Am J Hum Genet* 60, 381-387.
- Brown, M.D., Torroni, A., Reckord, C.L., and Wallace, D.C. (1995). Phylogenetic analysis of Leber's hereditary optic neuropathy mitochondrial DNA's indicates multiple independent occurrences of the common mutations. *Hum Mutat* 6, 311-325.
- Chen, A., Raule, N., Chomyn, A., and Attardi, G. (2012). Decreased reactive oxygen species production in cells with mitochondrial haplogroups associated with longevity. *PLoS One* 7, e46473.
- Crispim, D., Canani, L.H., Gross, J.L., Tschiedel, B., Souto, K.E., and Roisenberg, I. (2006). The European-specific mitochondrial cluster J/T could confer an increased risk of insulin-resistance and type 2 diabetes: an analysis of the m.4216T > C and m.4917A > G variants. *Ann Hum Genet* 70, 488-495.
- Darvishi, K., Sharma, S., Bhat, A.K., Rai, E., and Bamezai, R.N. (2007). Mitochondrial DNA G10398A polymorphism imparts maternal Haplogroup N a risk for breast and esophageal cancer. *Cancer Lett* 249, 249-255.
- De Benedictis, G., Rose, G., Carrieri, G., De Luca, M., Falcone, E., Passarino, G., Bonafe, M., Monti, D., Baggio, G., Bertolini, S., *et al.* (1999). Mitochondrial DNA inherited variants are associated with successful aging and longevity in humans. *FASEB J* 13, 1532-1536.
- Deason, M., Scott, R., Irwin, L., Macaulay, V., Fuku, N., Tanaka, M., Irving, R., Charlton, V., Morrison, E., Austin, K., *et al.* (2012). Importance of mitochondrial haplotypes and maternal lineage in sprint performance among individuals of West African ancestry. *Scand J Med Sci Sports* 22, 217-223.
- Fang, H., Shen, L., Chen, T., He, J., Ding, Z., Wei, J., Qu, J., Chen, G., Lu, J., and Bai, Y. (2010). Cancer type-specific modulation of mitochondrial haplogroups in breast, colorectal and thyroid cancer. *BMC cancer* 10, 421.
- Fuku, N., Park, K.S., Yamada, Y., Nishigaki, Y., Cho, Y.M., Matsuo, H., Segawa, T., Watanabe, S., Kato, K., Yokoi, K., *et al.* (2007). Mitochondrial haplogroup N9a confers resistance against type 2 diabetes in Asians. *Am J Hum Genet* 80, 407-415.

- Ghezzi, D., Marelli, C., Achilli, A., Goldwurm, S., Pezzoli, G., Barone, P., Pellecchia, M.T., Stanzione, P., Brusa, L., Bentivoglio, A.R., *et al.* (2005). Mitochondrial DNA haplogroup K is associated with a lower risk of Parkinson's disease in Italians. *Eur J Hum Genet* *13*, 748-752.
- Hendrickson, S.L., Hutcheson, H.B., Ruiz-Pesini, E., Poole, J.C., Lautenberger, J., Sezgin, E., Kingsley, L., Goedert, J.J., Vlahov, D., Donfield, S., *et al.* (2008). Mitochondrial DNA haplogroups influence AIDS progression. *AIDS* *22*, 2429-2439.
- Ivanova, R., Lepage, V., Charron, D., and Schachter, F. (1998). Mitochondrial genotype associated with French Caucasian centenarians. *Gerontology* *44*, 349.
- Johns, D.R., Neufeld, M.J., and Park, R.D. (1992). An ND-6 mitochondrial DNA mutation associated with Leber hereditary optic neuropathy. *Biochem Biophys Res Commun* *187*, 1551-1557.
- Jones, M.M., Manwaring, N., Wang, J.J., Rochtchina, E., Mitchell, P., and Sue, C.M. (2007). Mitochondrial DNA haplogroups and age-related maculopathy. *Arch Ophthalmol* *125*, 1235-1240.
- Khusnutdinova, E., Gilyazova, I., Ruiz-Pesini, E., Derbeneva, O., Khusainova, R., Khidiyatova, I., Magzhanov, R., and Wallace, D.C. (2008). A mitochondrial etiology of neurodegenerative diseases: evidence from Parkinson's disease. *Ann N Y Acad Sci* *1147*, 1-20.
- Kim, K.C., Cho, H.I., and Kim, W. (2012). MtDNA haplogroups and elite Korean athlete status. *Int J Sports Med* *33*, 76-80.
- Maruszak, A., Adamczyk, J.G., Siewierski, M., Sozanski, H., Gajewski, A., and Zekanowski, C. (2014). Mitochondrial DNA variation is associated with elite athletic status in the Polish population. *Scand J Med Sci Sports* *24*, 311-318.
- Mikami, E., Fuku, N., Takahashi, H., Ohiwa, N., Scott, R.A., Pitsiladis, Y.P., Higuchi, M., Kawahara, T., and Tanaka, M. (2011). Mitochondrial haplogroups associated with elite Japanese athlete status. *Br J Sports Med* *45*, 1179-1183.
- Niemi, A.K., Hervonen, A., Hurme, M., Karhunen, P.J., Jylha, M., and Majamaa, K. (2003). Mitochondrial DNA polymorphisms associated with longevity in a Finnish population. *Hum Genet* *112*, 29-33.
- Niemi, A.K., and Majamaa, K. (2005). Mitochondrial DNA and ACTN3 genotypes in Finnish elite endurance and sprint athletes. *Eur J Hum Genet* *13*, 965-969.
- Nishigaki, Y., Yamada, Y., Fuku, N., Matsuo, H., Segawa, T., Watanabe, S., Kato, K., Yokoi, K., Yamaguchi, S., Nozawa, Y., *et al.* (2007). Mitochondrial haplogroup N9b is protective against myocardial infarction in Japanese males. *Hum Genet* *120*, 827-836.
- Nogales-Gadea, G., Pinos, T., Ruiz, J.R., Marzo, P.F., Fiuza-Luces, C., Lopez-Gallardo, E., Ruiz-Pesini, E., Martin, M.A., Arenas, J., Moran, M., *et al.* (2011). Are mitochondrial haplogroups associated with elite athletic status? A study on a Spanish cohort. *Mitochondrion* *11*, 905-908.

Raby, B.A., Klanderma, B., Murphy, A., Mazza, S., Camargo, C.A., Jr., Silverman, E.K., and Weiss, S.T. (2007). A common mitochondrial haplogroup is associated with elevated total serum IgE levels. *J Allergy Clin Immunol* 120, 351-358.

Rose, G., Passarino, G., Carrieri, G., Altomare, K., Greco, V., Bertolini, S., Bonafe, M., Franceschi, C., and De Benedictis, G. (2001). Paradoxes in longevity: sequence analysis of mtDNA haplogroup J in centenarians. *Eur J Hum Genet* 9, 701-707.

Scott, R.A., Fuku, N., Onywera, V.O., Boit, M., Wilson, R.H., Tanaka, M., Goodwin, W.H., and Pitsiladis, Y.P. (2009). Mitochondrial haplogroups associated with elite Kenyan athlete status. *Med Sci Sports Exerc* 41, 123-128.

Shoffner, J.M., Brown, M.D., Torroni, A., Lott, M.T., Cabell, M.R., Mirra, S.S., Beal, M.F., Yang, C., Gearing, M., Salvo, R., *et al.* (1993). Mitochondrial DNA variants observed in Alzheimer disease and Parkinson disease patients. *Genomics* 17, 171-184.

Soto-Hermida, A., Fernandez-Moreno, M., Oreiro, N., Fernandez-Lopez, C., Rego-Perez, I., and Blanco, F.J. (2014). mtDNA haplogroups and osteoarthritis in different geographic populations. *Mitochondrion* 15, 18-23.

Tanaka, M., Gong, J.S., Zhang, J., Yoneda, M., and Yagi, K. (1998). Mitochondrial genotype associated with longevity. *Lancet* 351, 185-186.

Torroni, A., Petrozzi, M., D'Urbano, L., Sellitto, D., Zeviani, M., Carrara, F., Carducci, C., Leuzzi, V., Carelli, V., Barboni, P., *et al.* (1997). Haplotype and phylogenetic analyses suggest that one European-specific mtDNA background plays a role in the expression of Leber hereditary optic neuropathy by increasing the penetrance of the primary mutations 11778 and 14484. *Am J Hum Genet* 60, 1107-1121.

Udar, N., Atilano, S.R., Memarzadeh, M., Boyer, D.S., Chwa, M., Lu, S., Maguen, B., Langberg, J., Coskun, P., Wallace, D.C., *et al.* (2009). Mitochondrial DNA haplogroups associated with age-related macular degeneration. *Invest Ophthalmol Vis Sci* 50, 2966-2974.

van der Walt, J.M., Dementieva, Y.A., Martin, E.R., Scott, W.K., Nicodemus, K.K., Kroner, C.C., Welsh-Bohmer, K.A., Saunders, A.M., Roses, A.D., Small, G.W., *et al.* (2004). Analysis of European mitochondrial haplogroups with Alzheimer disease risk. *Neurosci Lett* 365, 28-32.

van der Walt, J.M., Nicodemus, K.K., Martin, E.R., Scott, W.K., Nance, M.A., Watts, R.L., Hubble, J.P., Haines, J.L., Koller, W.C., Lyons, K., *et al.* (2003). Mitochondrial polymorphisms significantly reduce the risk of Parkinson disease. *Am J Hum Genet* 72, 804-811.
